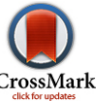

## Correction

# Correction: Effects of Statins on Incident Dementia in Patients with Type 2 DM: A Population-Based Retrospective Cohort Study in Taiwan

## The PLOS ONE Staff

There is an error in the affiliations for co-author, Jorng-Tzong Horng. The correct affiliations for Jorng-Tzong Horng are:

<sup>3</sup> Department of Biomedical Informatics, Asia University, Taichung, Taiwan

<sup>6</sup> Department of Computer Science and Information Engineering, National Central University, Chungli, Taiwan

## Reference

1. Chen J-M, Chang C-W, Chang T-H, Hsu C-C, Horng J-T, et al. (2014) Effects of Statins on Incident Dementia in Patients with Type 2 DM: A Population-Based Retrospective Cohort Study in Taiwan. PLoS ONE 9(2): e88434. doi:10.1371/journal.pone.0088434

---

**Citation:** The PLOS ONE Staff (2014) Correction: Effects of Statins on Incident Dementia in Patients with Type 2 DM: A Population-Based Retrospective Cohort Study in Taiwan. PLoS ONE 9(6): e100019. doi:10.1371/journal.pone.0100019

**Published:** June 9, 2014

**Copyright:** © 2014 The PLOS ONE Staff. This is an open-access article distributed under the terms of the Creative Commons Attribution License, which permits unrestricted use, distribution, and reproduction in any medium, provided the original author and source are credited.
